# Supplementary material for: Tailoring a Plasmodium vivax Vaccine To Enhance Efficacy through a Combination of a CSP Virus-Like Particle and TRAP Viral Vectors
Source: PubMed Central journal article supplement (PMC6105880; doi:10.1128/iai.00114-18), 2018-08-22
Supplement: zii999092538s1.pdf [file zii999092538s1.pdf]

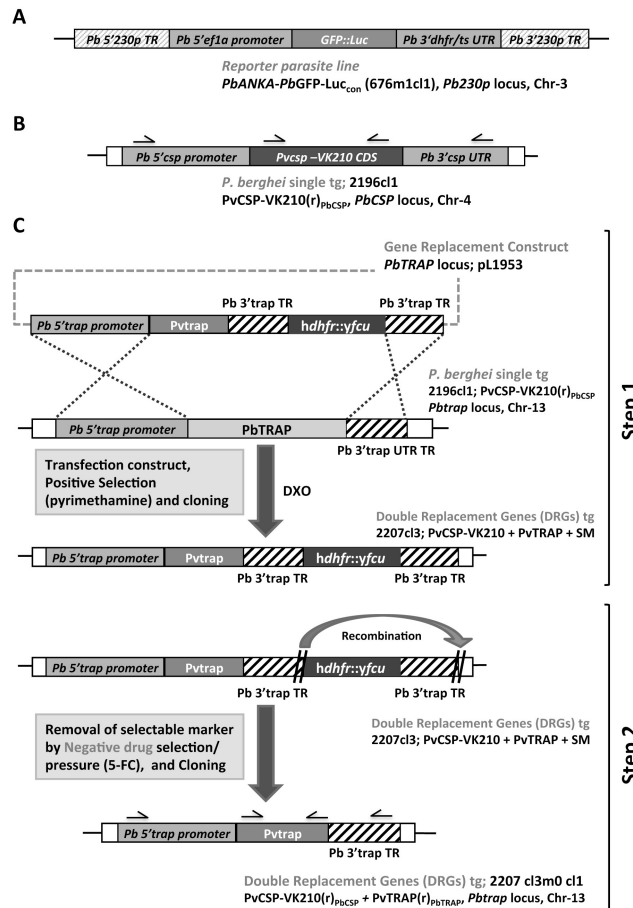

**Figure S1: Generation of the double transgenic parasite PvCSP+PvTRAP, line 2207 cl3m0 cl1.**

(A) Schematic representation of the transgenic Pb230p locus of the reporter PbANKA parasite line PbGFP-Lucef1 $\alpha$  (676m1cl1) used to generate the transgenic parasite line PvCSP-VK210(r)<sub>PbCSP</sub> (2196 cl1). (B) Schematic representation of the PvCSP-VK210(r)<sub>PbCSP</sub> (2196 cl1) expressing the *P. vivax* CSP-VK210 coding sequence (CDS) under the control of the endogenous *PbCSP* regulatory sequences in chromosome 4. (C) Schematic representation of the generation of the transgenic parasite line PvCSP+PvTRAP (2207 cl3m0 cl1), upon cloning of *PbTRAP* into chromosome 13 in PvCSP-VK210(r)<sub>PbCSP</sub> 2196 cl1. *1st step*: Construct 1; pL1953 was used to replace the *PbTRAP* CDS with PvTRAP, resulting in the generation of line 2207cl3; *PbANKA*-PvCSP-VK210+PvTRAP+Selectable Marker. *2nd step*:

Removal of the selectable marker by negative drug selection using 5-Fluorocytosine (5-FC), yielding the double transgenic parasite *PbANKA-PvCSP+PvTRAP* (2207 cl3m0 cl1). This line contains both *P. vivax* CSP-VK210 (not shown) and TRAP expressed under the control of their equivalent endogenous regulatory sequences *PbCSP* and *PbTRAP*. Black arrows: location of primers used for diagnostic PCR.

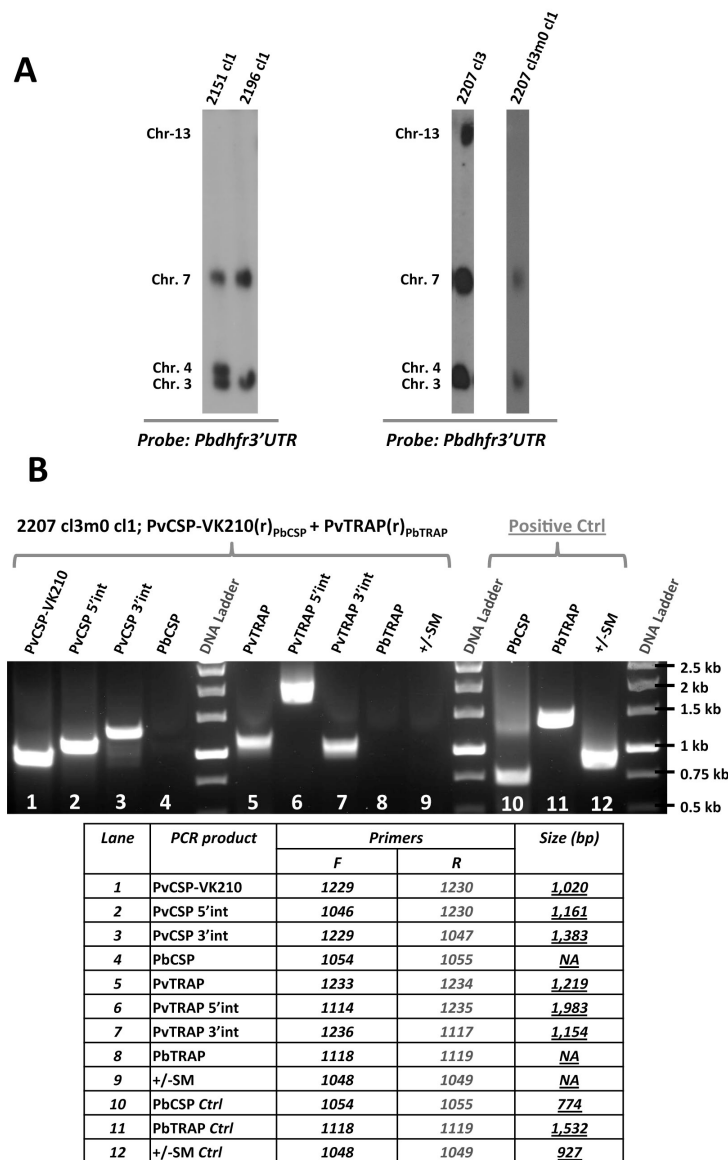

**Figure S2. Genotype analysis of the transgenic parasite *PbANKA*-PvCSP+PvTRAP, line 2207 c13m0 c1 and intermediate lines.**

(A) Southern blot analysis. *Left panel*: Hybridisation of chromosomes of the two background lines 2151 c1 (*PbANKA-PbCSP GIMO*) and 2196 c1 (*PbANKA-PvCSP-VK210(r)<sub>PbCSP</sub>*) with the 3'UTR *Pbdhfr/ts* probe. For 2151 c1, correct integration of the *SM* in the right locus in Chr-4 was confirmed by using the 3'UTR *Pbdhfr/ts* probe, which hybridizes in Chr-3, Chr-4 and Chr-7. Correct integration of the *PvCSP-VK210* expression construct into the *GIMO* locus was confirmed by the absence of the

*hdhfr::yfcu* SM cassette from chr.-4 in the cloned transgenic parasite line (2196 cl1).

*Right panel:* Hybridisation of chromosomes of the two *PbANKA*-*PvCSP*+*PvTRAP* lines with and without the *hdhfr::yfcu* SM cassette, *2207cl3* and *2207 cl3m0 cl1*, respectively with the 3'UTR *Pbdhfr/ts* probe. Correct integration of the *PvTRAP* expression construct was confirmed by showing positive hybridization in chr. 13 of the *2207 cl3*. Correct recombination and removal of the *hdhfr::yfcu* SM cassette was confirmed by negative hybridization of 3'UTR *Pbdhfr/ts* probe in chr. 13, while this probe hybridizes to the GFP-Luc reporter-cassette in chr. 3 (Figure S1,A) and to the endogenous *Pbdhfr/ts* on chr. 7. (B) Genotype analysis by diagnostic PCR analysis of the transgenic parasite line *2207 cl3m0 cl1* to confirm the correct integration of both *PvCSP-VK210* and *PvTRAP* expression cassettes. Correct integration is shown by the absence of the *hdhfr::yfcu* SM, the presence of the *PvCSP-VK210* CDS and *PvTRAP* CDS.
