# Supplementary material for: Tailoring a Plasmodium vivax Vaccine To Enhance Efficacy through a Combination of a CSP Virus-Like Particle and TRAP Viral Vectors
Source: PubMed Central journal article supplement (PMC6105880; doi:10.1128/iai.00114-18), 2018-08-22
Supplement: zii999092538s2.pdf [file zii999092538s2.pdf]

**Table S1:** Primers for genotyping the PvCSP+PvTRAP double transgenic parasite

| Primer No. | Description          | Primer sequences               |
|------------|----------------------|--------------------------------|
| 1046       | Pb5'CSP pro Int. F   | TTGATAACCCTCACATAAGACAATCC     |
| 1047       | Pb3'CSP UTR Int. R   | TCGATATCGTCATAGCAAGTAACTAC     |
| 1048       | hDHFR-yFCU (+/-SM) F | ATCATGCAAGACTTTGAAAGTGAC       |
| 1049       | hDHFR-yFCU (+/-SM) R | CATCGATTACCAGCTCTGAC           |
| 1054       | PbCSP F              | CCAAAGGAACTTAAACGAGCTATG       |
| 1055       | PbCSP R              | CTTATACCAGAACCACATGTTACG       |
| 1114       | Pb5'TRAP pro Int. F  | AAATTGCCCCCTTTTTGTGTTC         |
| 1117       | Pb3'TRAP UTR Int. R  | AATGACTCCAGACATAATAACACAGATATG |
| 1118       | PbTRAP F             | ATGGCTCAGGAAGTATTGGTC          |
| 1119       | PbTRAP R             | ACCTATGCATCCAATTATAGCTAATC     |
| 1229       | PvCSP-VK210 F        | TTATTTCCAACACATTGTGGACATAATG   |
| 1230       | PvCSP-VK210 R        | AGCACATTTATCCATTGTACATACATCTG  |
| 1233       | PvTRAP F             | ACAAATATGACAGCAGCATTAGATGAAG   |
| 1234       | PvTRAP R             | CTTCATCAAATGGTGCTGGTTC         |
| 1235       | PvTRAP 5'int. R      | TCTAATGCTGCTGTCATATTTGTTGTTC   |
| 1236       | PvTRAP 3'int. F      | ATAGTGCAAGAGATAGATATGCAAGAC    |
